# Supplementary material for: Green-synthesized zeolite Y-supported zero-valent iron nanocomposite for enhanced adsorptive reduction of hexavalent chromium from aqueous solutions
Source: Royal Society of Chemistry journal article supplement (doi:10.1039/d5ra09655c), 2026-05-15
Supplement: d5ra09655c1.pdf [file d5ra09655c1.pdf]

## Supporting Information

### **Green-Synthesized Zeolite Y–Supported Zero-Valent Iron Nanocomposite for Enhanced Adsorptive Reduction of Hexavalent Chromium from Aqueous Solutions**

Nur Fariha Mahmuda,<sup>a</sup> Yanuardi Raharjo,<sup>a,b,\*</sup> Tokok Adiarto,<sup>a,b</sup> Handoko Darmokoesoemo,<sup>b</sup>  
Heru Pramono<sup>c</sup> and Ahmad Fauzi Ismail<sup>a,d</sup>

a. Composite Materials & Applications Research Group (MSTRG), Chemistry Department, Faculty of Science and Technology, Universitas Airlangga, Surabaya 60115, Indonesia

b. Chemistry Department, Faculty of Science and Technology Universitas Airlangga, Surabaya 60115, Indonesia

c. Laboratory of Fisheries Microbiology, Department of Marine Science, Faculty of Fisheries and Marine, Universitas Airlangga, Surabaya 60115, Indonesia

d. Advances Membrane Technology Research Centre (AMTEC), Universiti Teknologi Malaysia, Skudai, 81310, Malaysia

## **1. Synthesis of Zeolite Y/nZVI**

Step 1: Zeolite Y (4 g) was added to 50 mL of 0.1 M  $\text{FeCl}_3 \cdot 6\text{H}_2\text{O}$  solution in a 250 mL Erlenmeyer flask (8% w/v) and magnetically stirred for 30 min.

Step 2: 50 mL of the green tea extract was added dropwise to the Zeolite Y mixture and continuously stirred for 30 min.

Step 3: The black suspension was centrifuged at 4000 rpm for 15 min to collect the residue.

Step 4: The residue was washed twice with DI water and twice with absolute ethanol.

Step 5: The black residue was then transferred to an evaporating dish and dried in a vacuum desiccator at room temperature (34°C). The powdered Zeolite Y/nZVI was stored in a vacuum desiccator until further use to prevent oxidation.

## 2. XRD of Zeolite Y

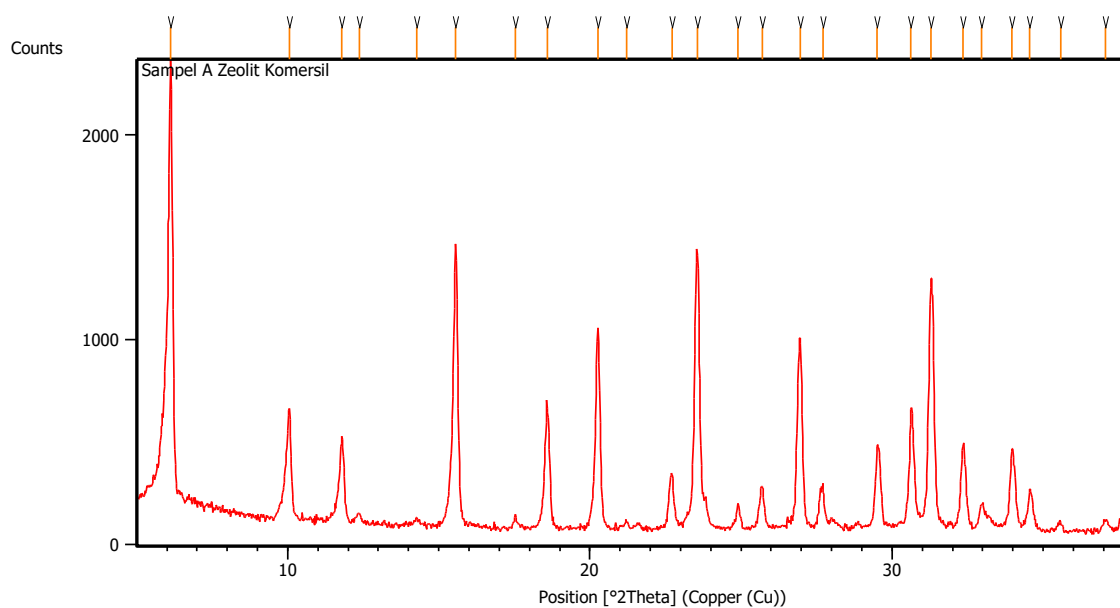

Peak List:

| Pos. [ $^{\circ}2\text{Th.}$ ] | Height [cts] | FWHM Left [ $^{\circ}2\text{Th.}$ ] | d-spacing [ $\text{\AA}$ ] | Rel. Int. [%] |
|--------------------------------|--------------|-------------------------------------|----------------------------|---------------|
| 6.1302                         | 2189.02      | 0.1338                              | 14.41806                   | 100.00        |
| 10.0556                        | 539.13       | 0.1171                              | 8.79674                    | 24.63         |
| 11.7913                        | 417.95       | 0.1338                              | 7.50543                    | 19.09         |
| 12.3862                        | 41.79        | 0.1171                              | 7.14627                    | 1.91          |
| 14.2793                        | 29.46        | 0.2007                              | 6.20283                    | 1.35          |
| 15.5603                        | 1385.78      | 0.1506                              | 5.69493                    | 63.31         |
| 17.5224                        | 53.41        | 0.1004                              | 5.06142                    | 2.44          |
| 18.5923                        | 585.60       | 0.0836                              | 4.77249                    | 26.75         |
| 20.2630                        | 987.90       | 0.1338                              | 4.38262                    | 45.13         |
| 21.2153                        | 36.36        | 0.1004                              | 4.18800                    | 1.66          |
| 22.7197                        | 265.24       | 0.1506                              | 3.91398                    | 12.12         |
| 23.5684                        | 1339.72      | 0.1506                              | 3.77492                    | 61.20         |
| 24.9092                        | 117.29       | 0.0669                              | 3.57469                    | 5.36          |
| 25.7024                        | 207.50       | 0.1338                              | 3.46614                    | 9.48          |

---

|         |         |        |         |       |
|---------|---------|--------|---------|-------|
| 26.9680 | 920.20  | 0.2007 | 3.30627 | 42.04 |
| 27.7075 | 223.63  | 0.1338 | 3.21969 | 10.22 |
| 29.5111 | 416.12  | 0.1171 | 3.02689 | 19.01 |
| 30.6280 | 592.68  | 0.1338 | 2.91901 | 27.08 |
| 31.2749 | 1190.55 | 0.1506 | 2.86010 | 54.39 |
| 32.3512 | 418.25  | 0.1506 | 2.76736 | 19.11 |
| 32.9613 | 126.67  | 0.1673 | 2.71752 | 5.79  |
| 33.9708 | 395.11  | 0.1171 | 2.63904 | 18.05 |
| 34.5579 | 203.26  | 0.0836 | 2.59554 | 9.29  |
| 35.5925 | 32.66   | 0.1673 | 2.52243 | 1.49  |
| 37.0728 | 50.24   | 0.2007 | 2.42504 | 2.30  |
| 37.7794 | 250.08  | 0.0836 | 2.38129 | 11.42 |

---

### 3. XRD of Zeolite Y/nZVI

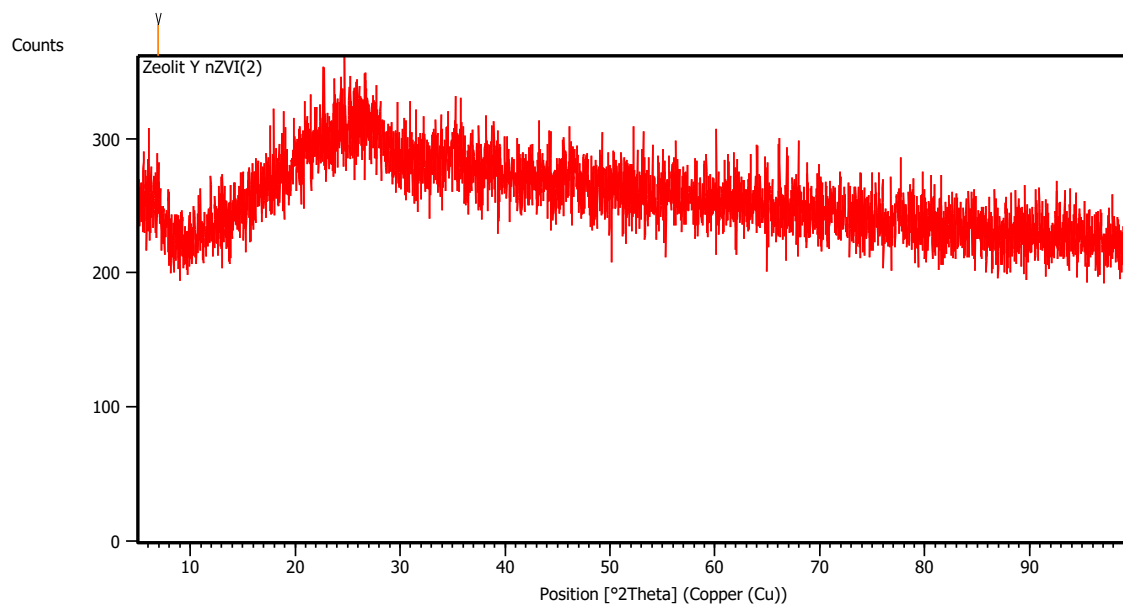

Peak List:

| Pos. [°2Th.] | Height [cts] | FWHM Left [°2Th.] | d-spacing [Å] | Rel. Int. [%] |
|--------------|--------------|-------------------|---------------|---------------|
| 6.9201       | 19.48        | 0.9792            | 12.76329      | 100.00        |

#### 4. Spectra FT-IR of Zeolite Y

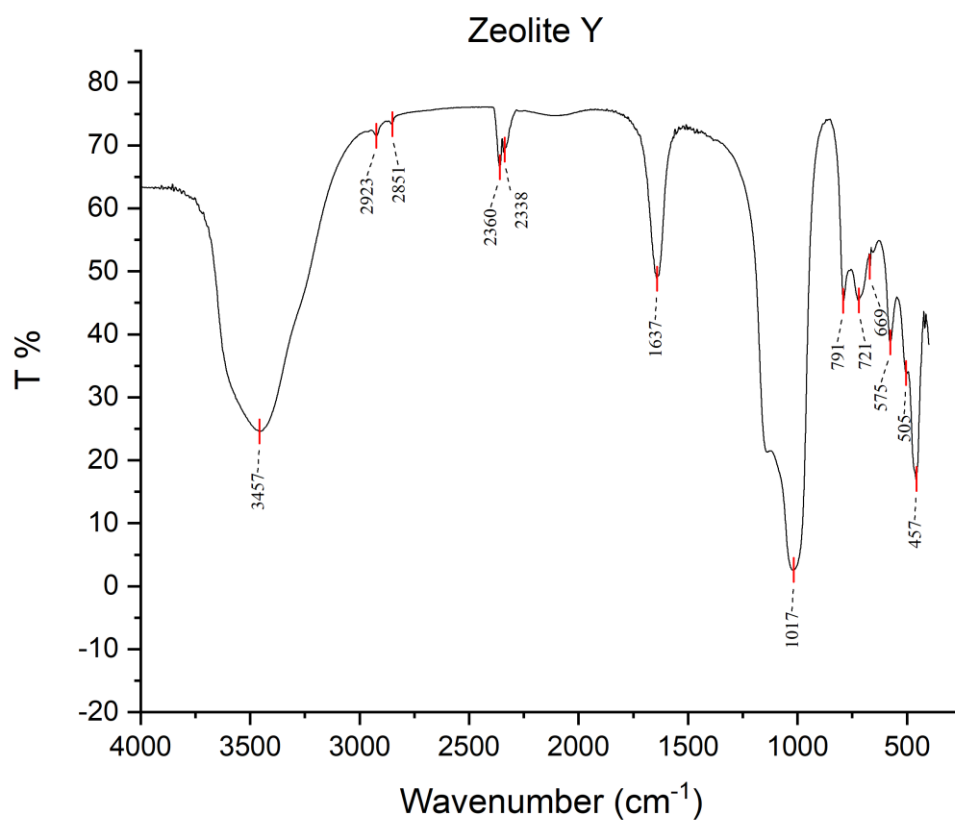

## 5. Spectra FT-IR of Zeolite Y/nZVI

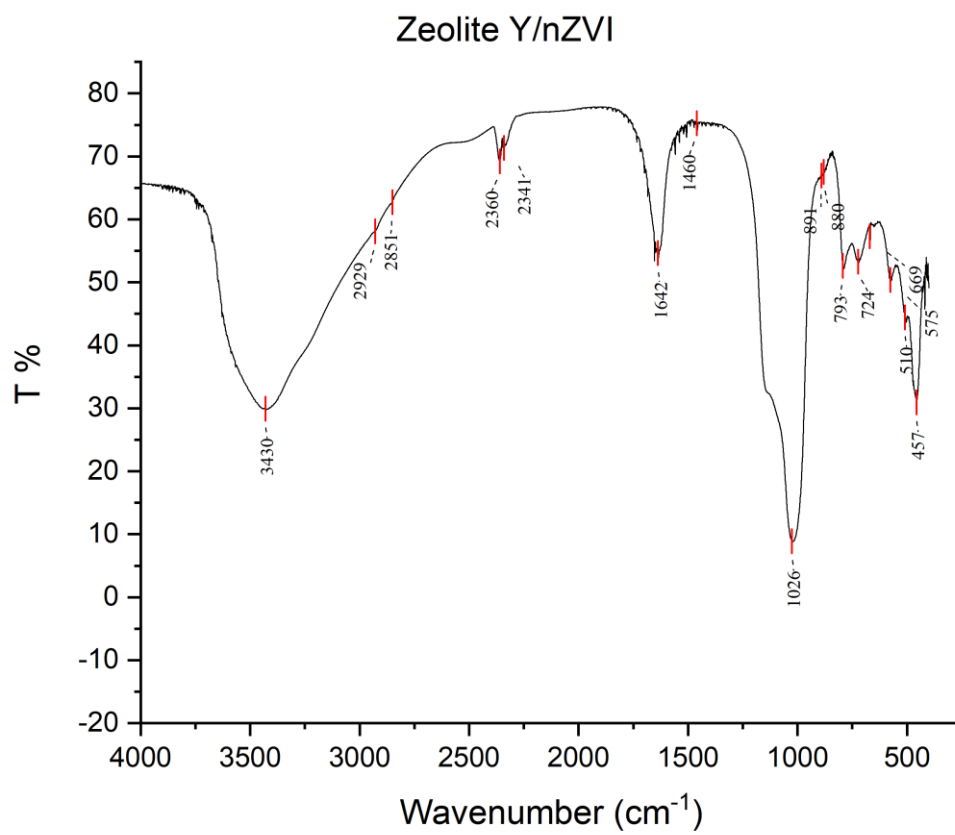

## 6. Spectra FT-IR of Zeolite Y/nZVI-Cr

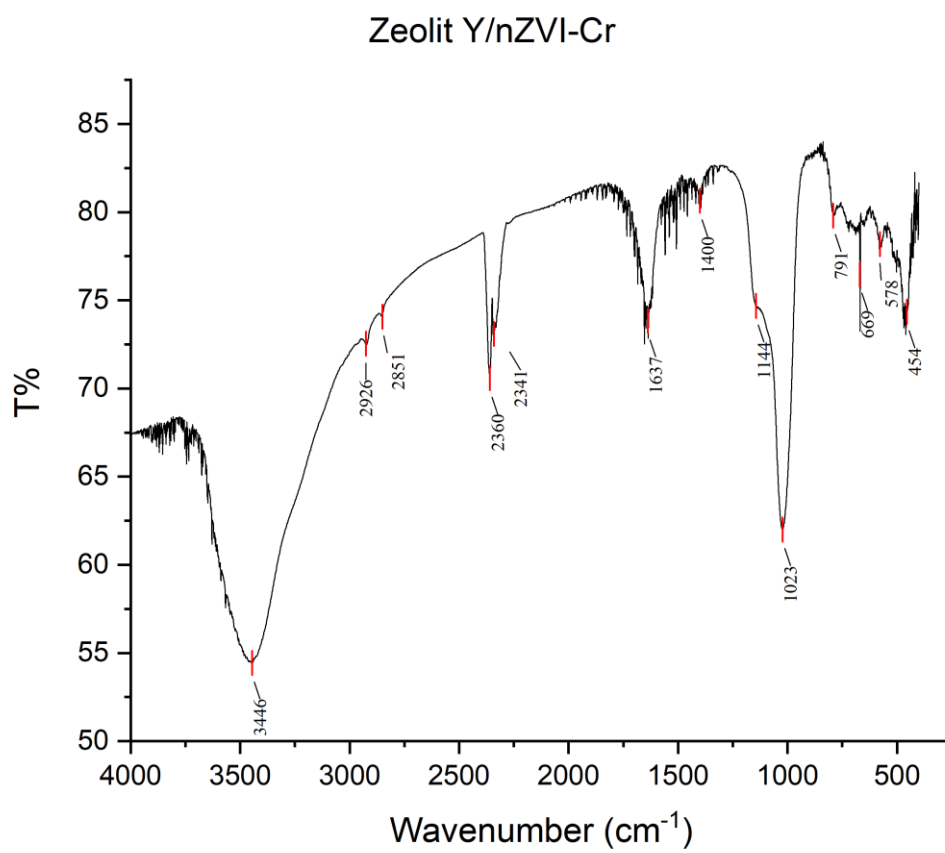

## 7. $pH_{PZC}$ of Zeolite Y/nZVI

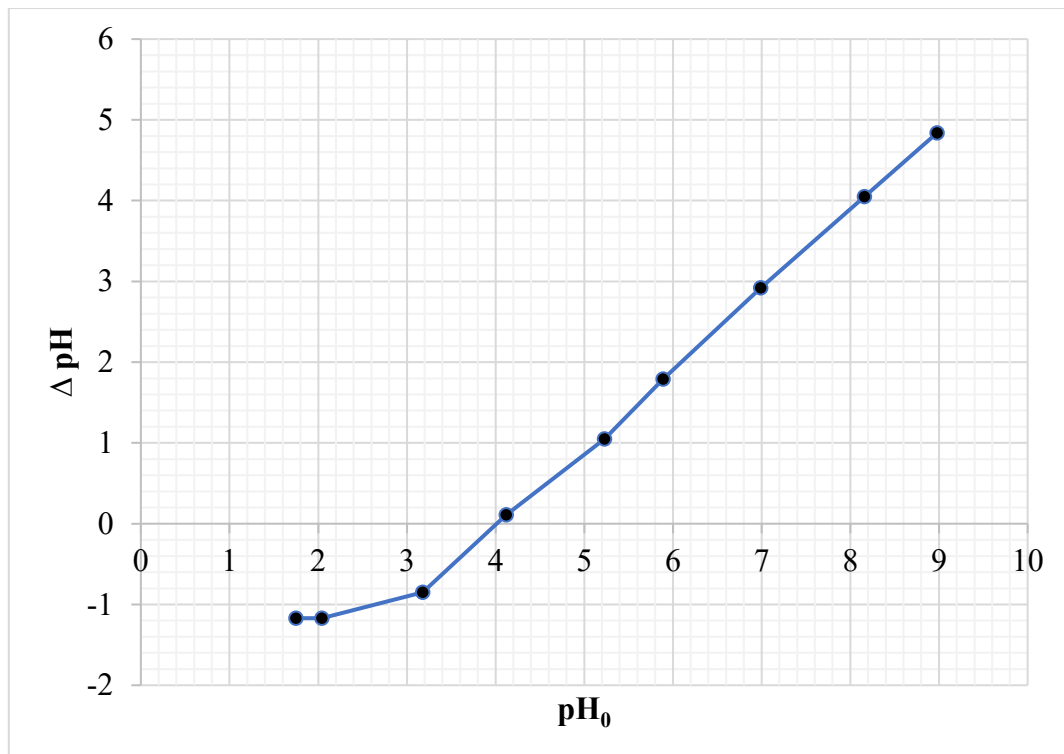

| No | $pH_0$ | $\Delta pH$ |
|----|--------|-------------|
| 1  | 1.75   | -1.17       |
| 2  | 2.04   | -1.17       |
| 3  | 3.18   | -0.85       |
| 4  | 4.12   | 0.11        |
| 5  | 5.23   | 1.05        |
| 6  | 5.89   | 1.79        |
| 7  | 6.99   | 2.92        |
| 8  | 8.16   | 4.05        |
| 9  | 8.98   | 4.84        |
